# Supplementary material for: Loss of Dickkopf 3 Promotes the Tumorigenesis of Basal Breast Cancer
Source: PubMed Central journal article supplement (PMC4965070; doi:10.1371/journal.pone.0160077), 2016-07-28
Supplement: pone.0160077.s001.pdf [file pone.0160077.s001.pdf]

**Supplementary Table 1: Clinico-pathological parameters of 30 cryoconserved breast cancer specimens analyzed in this study.**

| Parameter                             | Categorization                   | n <sup>a</sup> analyzable | %    |
|---------------------------------------|----------------------------------|---------------------------|------|
| Age at diagnosis:                     | median 63 years<br>(range 33-81) |                           |      |
|                                       | <63 years                        | 14                        | 46.7 |
|                                       | ≥63 years                        | 16                        | 53.3 |
| Tumor size <sup>b</sup>               | pT1                              | 14                        | 46.7 |
|                                       | pT2                              | 15                        | 50.0 |
|                                       | pT3                              | 1                         | 3.3  |
|                                       | pT4                              | 0                         | 0.0  |
| Lymph node status <sup>b</sup>        | pN0                              | 17                        | 56.7 |
|                                       | pN1-3                            | 12                        | 40.0 |
|                                       | unknown                          | 1                         | 3.3  |
| Histological tumor grade <sup>c</sup> | G1                               | 0                         | 0.0  |
|                                       | G2                               | 8                         | 26.7 |
|                                       | G3                               | 22                        | 73.3 |
| Oestrogen receptor status             | negative (IRS <sup>d</sup> 0-2)  | 16                        | 53.3 |
|                                       | positive (IRS <sup>d</sup> 3-12) | 14                        | 46.7 |
| Progesterone receptor status          | negative (IRS <sup>d</sup> 0-2)  | 15                        | 50.0 |
|                                       | positive (IRS <sup>d</sup> 3-12) | 15                        | 50.0 |
| HER2 status <sup>e</sup>              | negative                         | 24                        | 80.0 |
|                                       | positive                         | 6                         | 20.0 |

<sup>a</sup>Only female patients with primary, unilateral, invasive breast cancer were included. <sup>b</sup>According to TNM classification by Sobin and Wittekind [1]. <sup>c</sup>According to Bloom and Richardson, as modified by Elston and Ellis [2]. <sup>d</sup>Immunoreactive score (IRS) according to Remmele and Stegner [3]. <sup>e</sup>Overexpression of the *ERBB2* gene (Her-2/neu) was diagnosed analogously to the threshold of the DAKO-Score system based on IHC assay. Uncertain cases were additionally validated by FISH assay. Percentages may not sum-up to 100% due to rounding.

1. Sobin LH, Fleming ID. TNM Classification of Malignant Tumors, fifth edition (1997). Union Internationale Contre le Cancer and the American Joint Committee on Cancer. *Cancer*. 1997;80(9):1803-4. PubMed PMID: 9351551;
2. Elston CW, Ellis IO. Pathological prognostic factors in breast cancer. I. The value of histological grade in breast cancer: experience from a large study with long-term follow-up. *Histopathology*. 1991;19(5):403-10. PubMed PMID: 1757079;
3. Remmele W, Stegner HE. Recommendation for uniform definition of an immunoreactive score (IRS) for immunohistochemical estrogen receptor detection (ER-ICA) in breast cancer tissue. *Pathologie*. 1987;8(3):138-40. PubMed PMID: 3303008;
