# Supplementary material for: Loss of Dickkopf 3 Promotes the Tumorigenesis of Basal Breast Cancer
Source: PubMed Central journal article supplement (PMC4965070; doi:10.1371/journal.pone.0160077), 2016-07-28
Supplement: pone.0160077.s003.pdf [file pone.0160077.s003.pdf]

**TCGA breast cancer sample ID**

TCGA-A1-A0SB-01  
TCGA-A1-A0SD-01  
TCGA-A1-A0SE-01  
TCGA-A1-A0SF-01  
TCGA-A1-A0SG-01  
TCGA-A1-A0SH-01  
TCGA-A1-A0SI-01  
TCGA-A1-A0SJ-01  
TCGA-A1-A0SK-01  
TCGA-A1-A0SN-01  
TCGA-A1-A0SO-01  
TCGA-A1-A0SQ-01  
TCGA-A2-A04N-01  
TCGA-A2-A04P-01  
TCGA-A2-A04Q-01  
TCGA-A2-A04R-01  
TCGA-A2-A04T-01  
TCGA-A2-A04U-01  
TCGA-A2-A04V-01  
TCGA-A2-A04W-01  
TCGA-A2-A04X-01  
TCGA-A2-A04Y-01  
TCGA-A2-A0CL-01  
TCGA-A2-A0CM-01  
TCGA-A2-A0CP-01  
TCGA-A2-A0CQ-01  
TCGA-A2-A0CS-01  
TCGA-A2-A0CT-01  
TCGA-A2-A0CU-01  
TCGA-A2-A0CV-01  
TCGA-A2-A0CW-01  
TCGA-A2-A0CX-01  
TCGA-A2-A0CZ-01  
TCGA-A2-A0D0-01  
TCGA-A2-A0D1-01  
TCGA-A2-A0D2-01  
TCGA-A2-A0D3-01  
TCGA-A2-A0D4-01  
TCGA-A2-A0EM-01  
TCGA-A2-A0EN-01  
TCGA-A2-A0EO-01  
TCGA-A2-A0EQ-01  
TCGA-A2-A0ER-01  
TCGA-A2-A0ES-01  
TCGA-A2-A0ET-01  
TCGA-A2-A0EU-01  
TCGA-A2-A0EV-01  
TCGA-A2-A0EW-01

TCGA-A2-A0EX-01  
TCGA-A2-A0EY-01  
TCGA-A2-A0ST-01  
TCGA-A2-A0SU-01  
TCGA-A2-A0SV-01  
TCGA-A2-A0SW-01  
TCGA-A2-A0SX-01  
TCGA-A2-A0SY-01  
TCGA-A2-A0T0-01  
TCGA-A2-A0T1-01  
TCGA-A2-A0T2-01  
TCGA-A2-A0T3-01  
TCGA-A2-A0T4-01  
TCGA-A2-A0T5-01  
TCGA-A2-A0T6-01  
TCGA-A2-A0T7-01  
TCGA-A2-A0YC-01  
TCGA-A2-A0YD-01  
TCGA-A2-A0YE-01  
TCGA-A2-A0YF-01  
TCGA-A2-A0YG-01  
TCGA-A2-A0YH-01  
TCGA-A2-A0YI-01  
TCGA-A2-A0YJ-01  
TCGA-A2-A0YK-01  
TCGA-A2-A0YL-01  
TCGA-A2-A0YM-01  
TCGA-A2-A1FV-01  
TCGA-A2-A1FW-01  
TCGA-A2-A1FX-01  
TCGA-A2-A1FZ-01  
TCGA-A2-A1G0-01  
TCGA-A2-A1G1-01  
TCGA-A2-A1G4-01  
TCGA-A2-A1G6-01  
TCGA-A2-A259-01  
TCGA-A2-A25B-01  
TCGA-A2-A25C-01  
TCGA-A2-A25D-01  
TCGA-A2-A25E-01  
TCGA-A2-A25F-01  
TCGA-A2-A3KC-01  
TCGA-A2-A3KD-01  
TCGA-A7-A0CE-01  
TCGA-A7-A0CG-01  
TCGA-A7-A0CH-01  
TCGA-A7-A0CJ-01  
TCGA-A7-A0D9-01  
TCGA-A7-A0DA-01  
TCGA-A7-A0DB-01

TCGA-A7-A13D-01  
TCGA-A7-A13E-01  
TCGA-A7-A13F-01  
TCGA-A7-A26G-01  
TCGA-A7-A26J-01  
TCGA-A7-A3IY-01  
TCGA-A7-A3IZ-01  
TCGA-A7-A3J0-01  
TCGA-A8-A06N-01  
TCGA-A8-A06O-01  
TCGA-A8-A06P-01  
TCGA-A8-A06Q-01  
TCGA-A8-A06R-01  
TCGA-A8-A06X-01  
TCGA-A8-A06Y-01  
TCGA-A8-A06Z-01  
TCGA-A8-A075-01  
TCGA-A8-A076-01  
TCGA-A8-A079-01  
TCGA-A8-A07B-01  
TCGA-A8-A07C-01  
TCGA-A8-A07F-01  
TCGA-A8-A07G-01  
TCGA-A8-A07I-01  
TCGA-A8-A07J-01  
TCGA-A8-A07L-01  
TCGA-A8-A07O-01  
TCGA-A8-A07P-01  
TCGA-A8-A07R-01  
TCGA-A8-A07S-01  
TCGA-A8-A07U-01  
TCGA-A8-A07W-01  
TCGA-A8-A081-01  
TCGA-A8-A082-01  
TCGA-A8-A083-01  
TCGA-A8-A086-01  
TCGA-A8-A08B-01  
TCGA-A8-A08C-01  
TCGA-A8-A08G-01  
TCGA-A8-A08H-01  
TCGA-A8-A08I-01  
TCGA-A8-A08J-01  
TCGA-A8-A08L-01  
TCGA-A8-A08O-01  
TCGA-A8-A08P-01  
TCGA-A8-A08R-01  
TCGA-A8-A08T-01  
TCGA-A8-A08X-01  
TCGA-A8-A08Z-01  
TCGA-A8-A090-01

TCGA-A8-A092-01  
TCGA-A8-A094-01  
TCGA-A8-A095-01  
TCGA-A8-A096-01  
TCGA-A8-A097-01  
TCGA-A8-A099-01  
TCGA-A8-A09A-01  
TCGA-A8-A09B-01  
TCGA-A8-A09D-01  
TCGA-A8-A09G-01  
TCGA-A8-A09M-01  
TCGA-A8-A09N-01  
TCGA-A8-A09Q-01  
TCGA-A8-A09R-01  
TCGA-A8-A09T-01  
TCGA-A8-A09V-01  
TCGA-A8-A09W-01  
TCGA-A8-A09X-01  
TCGA-A8-A0A1-01  
TCGA-A8-A0A2-01  
TCGA-A8-A0A4-01  
TCGA-A8-A0A6-01  
TCGA-A8-A0A7-01  
TCGA-A8-A0A9-01  
TCGA-A8-A0AB-01  
TCGA-A8-A0AD-01  
TCGA-AC-A23C-01  
TCGA-AC-A23E-01  
TCGA-AC-A23G-01  
TCGA-AC-A23H-01  
TCGA-AC-A2B8-01  
TCGA-AC-A2BK-01  
TCGA-AC-A2BM-01  
TCGA-AC-A2FB-01  
TCGA-AC-A2FF-01  
TCGA-AC-A2FG-01  
TCGA-AC-A2FK-01  
TCGA-AC-A2FO-01  
TCGA-AC-A2QH-01  
TCGA-AC-A3HN-01  
TCGA-AC-A3OD-01  
TCGA-AN-A03X-01  
TCGA-AN-A03Y-01  
TCGA-AN-A041-01  
TCGA-AN-A046-01  
TCGA-AN-A049-01  
TCGA-AN-A04A-01  
TCGA-AN-A04C-01  
TCGA-AN-A04D-01  
TCGA-AN-A0AJ-01

TCGA-AN-A0AK-01  
TCGA-AN-A0AL-01  
TCGA-AN-A0AM-01  
TCGA-AN-A0AS-01  
TCGA-AN-A0AT-01  
TCGA-AN-A0FD-01  
TCGA-AN-A0FF-01  
TCGA-AN-A0FJ-01  
TCGA-AN-A0FK-01  
TCGA-AN-A0FL-01  
TCGA-AN-A0FN-01  
TCGA-AN-A0FS-01  
TCGA-AN-A0FT-01  
TCGA-AN-A0FV-01  
TCGA-AN-A0FW-01  
TCGA-AN-A0FX-01  
TCGA-AN-A0FY-01  
TCGA-AN-A0FZ-01  
TCGA-AN-A0G0-01  
TCGA-AN-A0XL-01  
TCGA-AN-A0XN-01  
TCGA-AN-A0XO-01  
TCGA-AN-A0XP-01  
TCGA-AN-A0XR-01  
TCGA-AN-A0XS-01  
TCGA-AN-A0XT-01  
TCGA-AN-A0XU-01  
TCGA-AN-A0XV-01  
TCGA-AN-A0XW-01  
TCGA-AO-A03L-01  
TCGA-AO-A03M-01  
TCGA-AO-A03N-01  
TCGA-AO-A03O-01  
TCGA-AO-A03P-01  
TCGA-AO-A03R-01  
TCGA-AO-A03T-01  
TCGA-AO-A03U-01  
TCGA-AO-A03V-01  
TCGA-AO-A0J2-01  
TCGA-AO-A0J3-01  
TCGA-AO-A0J4-01  
TCGA-AO-A0J6-01  
TCGA-AO-A0J7-01  
TCGA-AO-A0J8-01  
TCGA-AO-A0J9-01  
TCGA-AO-A0JA-01  
TCGA-AO-A0JC-01  
TCGA-AO-A0JD-01  
TCGA-AO-A0JE-01  
TCGA-AO-A0JF-01

TCGA-AO-A0JG-01  
TCGA-AO-A0JI-01  
TCGA-AO-A0JJ-01  
TCGA-AO-A0JL-01  
TCGA-AO-A0JM-01  
TCGA-AO-A124-01  
TCGA-AO-A125-01  
TCGA-AO-A126-01  
TCGA-AO-A128-01  
TCGA-AO-A129-01  
TCGA-AO-A12A-01  
TCGA-AO-A12B-01  
TCGA-AO-A12C-01  
TCGA-AO-A12D-01  
TCGA-AO-A12E-01  
TCGA-AO-A12F-01  
TCGA-AO-A12G-01  
TCGA-AO-A12H-01  
TCGA-AO-A1KO-01  
TCGA-AO-A1KP-01  
TCGA-AO-A1KR-01  
TCGA-AO-A1KS-01  
TCGA-AO-A1KT-01  
TCGA-AQ-A04H-01  
TCGA-AQ-A04J-01  
TCGA-AQ-A04L-01  
TCGA-AQ-A1H2-01  
TCGA-AQ-A1H3-01  
TCGA-AR-A0TP-01  
TCGA-AR-A0TQ-01  
TCGA-AR-A0TR-01  
TCGA-AR-A0TS-01  
TCGA-AR-A0TT-01  
TCGA-AR-A0TU-01  
TCGA-AR-A0TV-01  
TCGA-AR-A0TW-01  
TCGA-AR-A0TX-01  
TCGA-AR-A0TY-01  
TCGA-AR-A0TZ-01  
TCGA-AR-A0U0-01  
TCGA-AR-A0U2-01  
TCGA-AR-A0U3-01  
TCGA-AR-A0U4-01  
TCGA-AR-A1AH-01  
TCGA-AR-A1AI-01  
TCGA-AR-A1AJ-01  
TCGA-AR-A1AK-01  
TCGA-AR-A1AL-01  
TCGA-AR-A1AN-01  
TCGA-AR-A1AO-01

TCGA-AR-A1AP-01  
TCGA-AR-A1AQ-01  
TCGA-AR-A1AS-01  
TCGA-AR-A1AU-01  
TCGA-AR-A1AW-01  
TCGA-AR-A1AX-01  
TCGA-AR-A1AY-01  
TCGA-AR-A24H-01  
TCGA-AR-A24K-01  
TCGA-AR-A24L-01  
TCGA-AR-A24M-01  
TCGA-AR-A24N-01  
TCGA-AR-A24O-01  
TCGA-AR-A24P-01  
TCGA-AR-A24Q-01  
TCGA-AR-A24R-01  
TCGA-AR-A24S-01  
TCGA-AR-A24T-01  
TCGA-AR-A24U-01  
TCGA-AR-A24V-01  
TCGA-AR-A24W-01  
TCGA-AR-A24X-01  
TCGA-AR-A24Z-01  
TCGA-AR-A250-01  
TCGA-AR-A251-01  
TCGA-AR-A252-01  
TCGA-AR-A254-01  
TCGA-AR-A255-01  
TCGA-AR-A256-01  
TCGA-AR-A2LE-01  
TCGA-AR-A2LH-01  
TCGA-AR-A2LK-01  
TCGA-AR-A2LM-01  
TCGA-AR-A2LN-01  
TCGA-AR-A2LO-01  
TCGA-AR-A2LQ-01  
TCGA-B6-A0I1-01  
TCGA-B6-A0I2-01  
TCGA-B6-A0I5-01  
TCGA-B6-A0I6-01  
TCGA-B6-A0I9-01  
TCGA-B6-A0IA-01  
TCGA-B6-A0IB-01  
TCGA-B6-A0IC-01  
TCGA-B6-A0IE-01  
TCGA-B6-A0IG-01  
TCGA-B6-A0IH-01  
TCGA-B6-A0IJ-01  
TCGA-B6-A0IK-01  
TCGA-B6-A0IM-01

TCGA-B6-A0IN-01  
TCGA-B6-A0IO-01  
TCGA-B6-A0IP-01  
TCGA-B6-A0IQ-01  
TCGA-B6-A0RE-01  
TCGA-B6-A0RG-01  
TCGA-B6-A0RH-01  
TCGA-B6-A0RI-01  
TCGA-B6-A0RL-01  
TCGA-B6-A0RM-01  
TCGA-B6-A0RN-01  
TCGA-B6-A0RO-01  
TCGA-B6-A0RP-01  
TCGA-B6-A0RQ-01  
TCGA-B6-A0RS-01  
TCGA-B6-A0RT-01  
TCGA-B6-A0RU-01  
TCGA-B6-A0RV-01  
TCGA-B6-A0WS-01  
TCGA-B6-A0WT-01  
TCGA-B6-A0WV-01  
TCGA-B6-A0WW-01  
TCGA-B6-A0WX-01  
TCGA-B6-A0WY-01  
TCGA-B6-A0WZ-01  
TCGA-B6-A0X0-01  
TCGA-B6-A0X1-01  
TCGA-B6-A0X4-01  
TCGA-B6-A0X5-01  
TCGA-B6-A0X7-01  
TCGA-B6-A1KC-01  
TCGA-B6-A1KF-01  
TCGA-B6-A1KI-01  
TCGA-B6-A1KN-01  
TCGA-B6-A2IU-01  
TCGA-BH-A0AU-01  
TCGA-BH-A0AV-01  
TCGA-BH-A0AW-01  
TCGA-BH-A0AY-01  
TCGA-BH-A0AZ-01  
TCGA-BH-A0B0-01  
TCGA-BH-A0B1-01  
TCGA-BH-A0B3-01  
TCGA-BH-A0B5-01  
TCGA-BH-A0B7-01  
TCGA-BH-A0B8-01  
TCGA-BH-A0BA-01  
TCGA-BH-A0BC-01  
TCGA-BH-A0BD-01  
TCGA-BH-A0BF-01



TCGA-BH-A0BG-01  
TCGA-BH-A0BJ-01  
TCGA-BH-A0BL-01  
TCGA-BH-A0BM-01  
TCGA-BH-A0BO-01  
TCGA-BH-A0BP-01  
TCGA-BH-A0BQ-01  
TCGA-BH-A0BR-01  
TCGA-BH-A0BS-01  
TCGA-BH-A0BT-01  
TCGA-BH-A0BV-01  
TCGA-BH-A0BW-01  
TCGA-BH-A0BZ-01  
TCGA-BH-A0C0-01  
TCGA-BH-A0C1-01  
TCGA-BH-A0C3-01  
TCGA-BH-A0C7-01  
TCGA-BH-A0DE-01  
TCGA-BH-A0DG-01  
TCGA-BH-A0DH-01  
TCGA-BH-A0DI-01  
TCGA-BH-A0DK-01  
TCGA-BH-A0DL-01  
TCGA-BH-A0DP-01  
TCGA-BH-A0DQ-01  
TCGA-BH-A0DS-01  
TCGA-BH-A0DT-01  
TCGA-BH-A0DV-01  
TCGA-BH-A0DX-01  
TCGA-BH-A0DZ-01  
TCGA-BH-A0E0-01  
TCGA-BH-A0E1-01  
TCGA-BH-A0E2-01  
TCGA-BH-A0E6-01  
TCGA-BH-A0E7-01  
TCGA-BH-A0E9-01  
TCGA-BH-A0EB-01  
TCGA-BH-A0EE-01  
TCGA-BH-A0EI-01  
TCGA-BH-A0GY-01  
TCGA-BH-A0GZ-01  
TCGA-BH-A0H0-01  
TCGA-BH-A0H3-01  
TCGA-BH-A0H5-01  
TCGA-BH-A0H6-01  
TCGA-BH-A0H7-01  
TCGA-BH-A0H9-01  
TCGA-BH-A0HA-01  
TCGA-BH-A0HB-01  
TCGA-BH-A0HF-01

TCGA-BH-A0HI-01  
TCGA-BH-A0HK-01  
TCGA-BH-A0HO-01  
TCGA-BH-A0HP-01  
TCGA-BH-A0HQ-01  
TCGA-BH-A0HU-01  
TCGA-BH-A0HW-01  
TCGA-BH-A0HX-01  
TCGA-BH-A0HY-01  
TCGA-BH-A0RX-01  
TCGA-BH-A0W3-01  
TCGA-BH-A0W4-01  
TCGA-BH-A0W5-01  
TCGA-BH-A0W7-01  
TCGA-BH-A0WA-01  
TCGA-BH-A18F-01  
TCGA-BH-A18G-01  
TCGA-BH-A18H-01  
TCGA-BH-A18I-01  
TCGA-BH-A18J-01  
TCGA-BH-A18K-01  
TCGA-BH-A18L-01  
TCGA-BH-A18M-01  
TCGA-BH-A18N-01  
TCGA-BH-A18P-01  
TCGA-BH-A18Q-01  
TCGA-BH-A18R-01  
TCGA-BH-A18S-01  
TCGA-BH-A18T-01  
TCGA-BH-A18U-01  
TCGA-BH-A18V-01  
TCGA-BH-A1EN-01  
TCGA-BH-A1EO-01  
TCGA-BH-A1ES-01  
TCGA-BH-A1ET-01  
TCGA-BH-A1EU-01  
TCGA-BH-A1EV-01  
TCGA-BH-A1EW-01  
TCGA-BH-A1EX-01  
TCGA-BH-A1EY-01  
TCGA-BH-A1F0-01  
TCGA-BH-A1F2-01  
TCGA-BH-A1F6-01  
TCGA-BH-A1F8-01  
TCGA-BH-A1FB-01  
TCGA-BH-A1FC-01  
TCGA-BH-A1FD-01  
TCGA-BH-A1FE-01  
TCGA-BH-A1FG-01  
TCGA-BH-A1FH-01

TCGA-BH-A1FJ-01  
TCGA-BH-A1FL-01  
TCGA-BH-A1FM-01  
TCGA-BH-A1FN-01  
TCGA-BH-A1FR-01  
TCGA-BH-A1FU-01  
TCGA-BH-A201-01  
TCGA-BH-A202-01  
TCGA-BH-A203-01  
TCGA-BH-A204-01  
TCGA-BH-A208-01  
TCGA-BH-A209-01  
TCGA-BH-A28Q-01  
TCGA-BH-A2L8-01  
TCGA-C8-A12K-01  
TCGA-C8-A12L-01  
TCGA-C8-A12M-01  
TCGA-C8-A12N-01  
TCGA-C8-A12O-01  
TCGA-C8-A12P-01  
TCGA-C8-A12Q-01  
TCGA-C8-A12T-01  
TCGA-C8-A12U-01  
TCGA-C8-A12V-01  
TCGA-C8-A12W-01  
TCGA-C8-A12X-01  
TCGA-C8-A12Y-01  
TCGA-C8-A12Z-01  
TCGA-C8-A130-01  
TCGA-C8-A131-01  
TCGA-C8-A132-01  
TCGA-C8-A133-01  
TCGA-C8-A134-01  
TCGA-C8-A135-01  
TCGA-C8-A137-01  
TCGA-C8-A138-01  
TCGA-C8-A1HE-01  
TCGA-C8-A1HF-01  
TCGA-C8-A1HG-01  
TCGA-C8-A1HJ-01  
TCGA-C8-A1HK-01  
TCGA-C8-A1HM-01  
TCGA-C8-A1HN-01  
TCGA-C8-A1HO-01  
TCGA-C8-A26V-01  
TCGA-C8-A26W-01  
TCGA-C8-A26X-01  
TCGA-C8-A26Y-01  
TCGA-C8-A26Z-01  
TCGA-C8-A273-01

TCGA-C8-A274-01  
TCGA-C8-A275-01  
TCGA-C8-A278-01  
TCGA-C8-A27A-01  
TCGA-C8-A27B-01  
TCGA-C8-A3M7-01  
TCGA-C8-A3M8-01  
TCGA-D8-A13Y-01  
TCGA-D8-A13Z-01  
TCGA-D8-A140-01  
TCGA-D8-A141-01  
TCGA-D8-A142-01  
TCGA-D8-A143-01  
TCGA-D8-A145-01  
TCGA-D8-A147-01  
TCGA-D8-A1J8-01  
TCGA-D8-A1J9-01  
TCGA-D8-A1JA-01  
TCGA-D8-A1JB-01  
TCGA-D8-A1JC-01  
TCGA-D8-A1JD-01  
TCGA-D8-A1JE-01  
TCGA-D8-A1JF-01  
TCGA-D8-A1JG-01  
TCGA-D8-A1JH-01  
TCGA-D8-A1JI-01  
TCGA-D8-A1JJ-01  
TCGA-D8-A1JK-01  
TCGA-D8-A1JL-01  
TCGA-D8-A1JM-01  
TCGA-D8-A1JN-01  
TCGA-D8-A1JP-01  
TCGA-D8-A1JS-01  
TCGA-D8-A1JT-01  
TCGA-D8-A1JU-01  
TCGA-D8-A1X5-01  
TCGA-D8-A1X6-01  
TCGA-D8-A1X7-01  
TCGA-D8-A1X8-01  
TCGA-D8-A1X9-01  
TCGA-D8-A1XA-01  
TCGA-D8-A1XB-01  
TCGA-D8-A1XC-01  
TCGA-D8-A1XD-01  
TCGA-D8-A1XF-01  
TCGA-D8-A1XG-01  
TCGA-D8-A1XJ-01  
TCGA-D8-A1XK-01  
TCGA-D8-A1XL-01  
TCGA-D8-A1XM-01

TCGA-D8-A1XO-01  
TCGA-D8-A1XQ-01  
TCGA-D8-A1XR-01  
TCGA-D8-A1XT-01  
TCGA-D8-A1XU-01  
TCGA-D8-A1XV-01  
TCGA-D8-A1XW-01  
TCGA-D8-A1XY-01  
TCGA-D8-A1XZ-01  
TCGA-D8-A1Y0-01  
TCGA-D8-A1Y1-01  
TCGA-D8-A1Y2-01  
TCGA-D8-A1Y3-01  
TCGA-D8-A27E-01  
TCGA-D8-A27F-01  
TCGA-D8-A27G-01  
TCGA-D8-A27H-01  
TCGA-D8-A27I-01  
TCGA-D8-A27K-01  
TCGA-D8-A27L-01  
TCGA-D8-A27M-01  
TCGA-D8-A27N-01  
TCGA-D8-A27P-01  
TCGA-D8-A27R-01  
TCGA-D8-A27T-01  
TCGA-D8-A27V-01  
TCGA-D8-A27W-01  
TCGA-E2-A105-01  
TCGA-E2-A106-01  
TCGA-E2-A108-01  
TCGA-E2-A109-01  
TCGA-E2-A10A-01  
TCGA-E2-A10B-01  
TCGA-E2-A10C-01  
TCGA-E2-A10E-01  
TCGA-E2-A10F-01  
TCGA-E2-A14N-01  
TCGA-E2-A14O-01  
TCGA-E2-A14P-01  
TCGA-E2-A14Q-01  
TCGA-E2-A14R-01  
TCGA-E2-A14S-01  
TCGA-E2-A14T-01  
TCGA-E2-A14V-01  
TCGA-E2-A14X-01  
TCGA-E2-A14Y-01  
TCGA-E2-A14Z-01  
TCGA-E2-A150-01  
TCGA-E2-A152-01  
TCGA-E2-A153-01

TCGA-E2-A154-01  
TCGA-E2-A155-01  
TCGA-E2-A156-01  
TCGA-E2-A158-01  
TCGA-E2-A159-01  
TCGA-E2-A15A-01  
TCGA-E2-A15C-01  
TCGA-E2-A15D-01  
TCGA-E2-A15E-01  
TCGA-E2-A15G-01  
TCGA-E2-A15H-01  
TCGA-E2-A15I-01  
TCGA-E2-A15J-01  
TCGA-E2-A15K-01  
TCGA-E2-A15L-01  
TCGA-E2-A15M-01  
TCGA-E2-A15P-01  
TCGA-E2-A15R-01  
TCGA-E2-A15S-01  
TCGA-E2-A1AZ-01  
TCGA-E2-A1B0-01  
TCGA-E2-A1B1-01  
TCGA-E2-A1B4-01  
TCGA-E2-A1B5-01  
TCGA-E2-A1BD-01  
TCGA-E2-A1IE-01  
TCGA-E2-A1IF-01  
TCGA-E2-A1IG-01  
TCGA-E2-A1IH-01  
TCGA-E2-A1II-01  
TCGA-E2-A1IJ-01  
TCGA-E2-A1IK-01  
TCGA-E2-A1IL-01  
TCGA-E2-A1IN-01  
TCGA-E2-A1IO-01  
TCGA-E2-A1IU-01  
TCGA-E2-A1L6-01  
TCGA-E2-A1L7-01  
TCGA-E2-A1L9-01  
TCGA-E2-A1LA-01  
TCGA-E2-A1LB-01  
TCGA-E2-A1LH-01  
TCGA-E2-A1LI-01  
TCGA-E2-A1LK-01  
TCGA-E2-A1LL-01  
TCGA-E2-A1LS-01  
TCGA-E2-A3DX-01  
TCGA-E9-A1N3-01  
TCGA-E9-A1N4-01  
TCGA-E9-A1N5-01

TCGA-E9-A1N6-01  
TCGA-E9-A1N8-01  
TCGA-E9-A1N9-01  
TCGA-E9-A1NA-01  
TCGA-E9-A1ND-01  
TCGA-E9-A1NE-01  
TCGA-E9-A1NF-01  
TCGA-E9-A1NG-01  
TCGA-E9-A1NH-01  
TCGA-E9-A1NI-01  
TCGA-E9-A1QZ-01  
TCGA-E9-A1R0-01  
TCGA-E9-A1R2-01  
TCGA-E9-A1R3-01  
TCGA-E9-A1R4-01  
TCGA-E9-A1R5-01  
TCGA-E9-A1R6-01  
TCGA-E9-A1R7-01  
TCGA-E9-A1RB-01  
TCGA-E9-A1RC-01  
TCGA-E9-A1RD-01  
TCGA-E9-A1RE-01  
TCGA-E9-A1RF-01  
TCGA-E9-A1RH-01  
TCGA-E9-A1RI-01  
TCGA-E9-A226-01  
TCGA-E9-A227-01  
TCGA-E9-A228-01  
TCGA-E9-A229-01  
TCGA-E9-A22A-01  
TCGA-E9-A22B-01  
TCGA-E9-A22D-01  
TCGA-E9-A22E-01  
TCGA-E9-A22G-01  
TCGA-E9-A22H-01  
TCGA-E9-A243-01  
TCGA-E9-A244-01  
TCGA-E9-A245-01  
TCGA-E9-A247-01  
TCGA-E9-A248-01  
TCGA-E9-A249-01  
TCGA-E9-A24A-01  
TCGA-E9-A295-01  
TCGA-E9-A2JS-01  
TCGA-E9-A2JT-01  
TCGA-E9-A3HO-01  
TCGA-E9-A3Q9-01  
TCGA-EW-A1IW-01  
TCGA-EW-A1IX-01  
TCGA-EW-A1IY-01

TCGA-EW-A1J1-01  
TCGA-EW-A1J2-01  
TCGA-EW-A1J3-01  
TCGA-EW-A1J5-01  
TCGA-EW-A1J6-01  
TCGA-EW-A1OV-01  
TCGA-EW-A1OW-01  
TCGA-EW-A1OX-01  
TCGA-EW-A1OY-01  
TCGA-EW-A1OZ-01  
TCGA-EW-A1P0-01  
TCGA-EW-A1P4-01  
TCGA-EW-A1P5-01  
TCGA-EW-A1P6-01  
TCGA-EW-A1P7-01  
TCGA-EW-A1P8-01  
TCGA-EW-A1PA-01  
TCGA-EW-A1PB-01  
TCGA-EW-A1PC-01  
TCGA-EW-A1PE-01  
TCGA-EW-A1PF-01  
TCGA-EW-A1PG-01  
TCGA-EW-A1PH-01  
TCGA-EW-A2FR-01  
TCGA-EW-A2FS-01  
TCGA-EW-A2FV-01  
TCGA-EW-A2FW-01  
TCGA-GI-A2C9-01  
TCGA-GM-A2D9-01  
TCGA-GM-A2DA-01  
TCGA-GM-A2DB-01  
TCGA-GM-A2DC-01  
TCGA-GM-A2DD-01  
TCGA-GM-A2DF-01  
TCGA-GM-A2DH-01  
TCGA-GM-A2DI-01  
TCGA-GM-A2DK-01  
TCGA-GM-A2DL-01  
TCGA-GM-A2DM-01  
TCGA-GM-A2DN-01  
TCGA-GM-A2DO-01  
TCGA-GM-A3NY-01  
TCGA-HN-A2NL-01
