# Supplementary material for: Loss of Dickkopf 3 Promotes the Tumorigenesis of Basal Breast Cancer
Source: PubMed Central journal article supplement (PMC4965070; doi:10.1371/journal.pone.0160077), 2016-07-28
Supplement: pone.0160077.s004.pdf [file pone.0160077.s004.pdf]

**Supplementary Table 4: Clinico-pathological parameters of 791 breast cancer specimens obtained from *The Cancer Genome Atlas* platform.**

| Parameter                      | Categorisation                   | n <sup>a</sup> analysable | %    |
|--------------------------------|----------------------------------|---------------------------|------|
| Age at diagnosis:              | median 58 years<br>(range 26-90) |                           |      |
|                                | ≤58 years                        | 409                       | 51.7 |
|                                | >58 years                        | 382                       | 48.3 |
| Tumour size <sup>b</sup>       | pT1                              | 209                       | 26.4 |
|                                | pT2                              | 468                       | 59.2 |
|                                | pT3                              | 83                        | 10.5 |
|                                | pT4                              | 28                        | 3.5  |
|                                | unknown                          | 3                         | 0.4  |
| Lymph node status <sup>b</sup> | pN0                              | 375                       | 47.4 |
|                                | pN1-3                            | 403                       | 51.0 |
|                                | unknown                          | 13                        | 1.6  |
| Oestrogen receptor status      | negative (IRS <sup>c</sup> 0-2)  | 176                       | 22.3 |
|                                | positive (IRS <sup>c</sup> 3-12) | 577                       | 73.0 |
|                                | unknown                          | 38                        | 4.8  |
| Progesterone receptor status   | negative (IRS <sup>c</sup> 0-2)  | 246                       | 31.1 |
|                                | positive (IRS <sup>c</sup> 3-12) | 504                       | 63.7 |
|                                | unknown                          | 41                        | 5.2  |
| HER2 status <sup>d</sup>       | negative                         | 600                       | 75.9 |
|                                | positive                         | 102                       | 12.8 |
|                                | unknown                          | 89                        | 11.3 |

<sup>a</sup>Only female patients with primary, invasive breast cancer were included. <sup>b</sup>According to TNM classification by Sobin and Wittekind [1]. <sup>c</sup>Immunoreactive score (IRS) according to Remmele and Stegner [2]. <sup>d</sup>Overexpression of the *ERBB2* gene (Her-2/neu) was diagnosed analogously to the threshold of the DAKO-Score system based on IHC assay. Percentages may not sum-up to 100% due to rounding.

1. Sobin LH, Fleming ID. TNM Classification of Malignant Tumors, fifth edition (1997). Union Internationale Contre le Cancer and the American Joint Committee on Cancer. *Cancer*. 1997;80(9):1803-4. PubMed PMID: 9351551;
2. Remmele W, Stegner HE. Recommendation for uniform definition of an immunoreactive score (IRS) for immunohistochemical estrogen receptor detection (ER-ICA) in breast cancer tissue. *Pathologie*. 1987;8(3):138-40. PubMed PMID: 3303008;
