# Supplementary material for: Loss of Dickkopf 3 Promotes the Tumorigenesis of Basal Breast Cancer
Source: PubMed Central journal article supplement (PMC4965070; doi:10.1371/journal.pone.0160077), 2016-07-28
Supplement: pone.0160077.s005.pdf [file pone.0160077.s005.pdf]

**S5 Table: Primer sequences and PCR conditions for RNA expression analysis**

| <b>Primer</b>             | <b>Sequence</b>                  | <b>Product size [bp]</b> |
|---------------------------|----------------------------------|--------------------------|
| <i>DKK3</i> forward       | 5'-AAGGCAGAAGGAGCCACGAGTGC-3'    | 182                      |
| <i>DKK3</i> reverse       | 5'-GGCCATTTTGGTGCAGTGACCCCA -3'  |                          |
| <i>GAPDH</i> forward      | 5'-GAAGGTGAAGTCCGAGTCA-3'        | 108                      |
| <i>GAPDH</i> reverse      | 5'-AATGAAGGGGTCATTGATGG-3'       |                          |
| <i>E-Cadherin</i> forward | 5'-TGCCCAGAAAATGAAAAAGG-3'       | 200                      |
| <i>E-Cadherin</i> reverse | 5'-GTGTATGTGGCAATGCGTTC-3'       |                          |
| <i>Occludin</i> forward   | 5'-CTATAAATCCACGCCGGTTC -3'      | 243                      |
| <i>Occludin</i> reverse   | 5'-GGTGGATATTCCCTGATCCA-3'       |                          |
| <i>Claudin 1</i> forward  | 5'-CTATGACCCTATGACCCCAAGT -3'    | 158                      |
| <i>Claudin 1</i> reverse  | 5'-TTGGATAGGGCCTTGGTGTT -3'      |                          |
| <i>TJP1</i> forward       | 5'-GCAAAAATTACAATTAGAAGGAAGAA-3' | 300                      |
| <i>TJP1</i> reverse       | 5'-TCGAAGACCATATTCTTCATTTTTC-3'  |                          |
| <i>Snail 1</i> forward    | 5'-CTGGGTGCCCTCAAGATG-3'         | 129                      |
| <i>Snail 1</i> reverse    | 5'-AGAAGGGCTTCTCGCCAGT-3'        |                          |
| <i>Vimentin</i> forward   | 5'-TCCACGAAGAGGAAATCCAG-3'       | 314                      |
| <i>Vimentin</i> reverse   | 5'-TTCCAGGGACTCATTGGTTC-3'       |                          |

**Real-time PCR reaction volumes of 20 µl consisted of the following components:**

5 µM forward primer, 5 µM reverse primer, 10 µl SYBR GRN Supermix and 1 µl of cDNA as PCR template. Cycle conditions: 95°C for 3 min, 40 cycles of 95°C for 30 s, 60°C for 20 s, 72°C for 30 s. bp: base pairs.
