# Supplementary material for: Loss of Dickkopf 3 Promotes the Tumorigenesis of Basal Breast Cancer
Source: PubMed Central journal article supplement (PMC4965070; doi:10.1371/journal.pone.0160077), 2016-07-28
Supplement: pone.0160077.s006.pdf [file pone.0160077.s006.pdf]

**Supplementary Table 6: Clinico-pathological parameters of cryoconserved breast cancer specimens in relation to *DKK3* mRNA expression**

| Parameter                             | n <sup>a</sup> | <i>DKK3</i> high <sup>b</sup> | <i>DKK3</i> low <sup>b</sup> | P-value <sup>c</sup> |
|---------------------------------------|----------------|-------------------------------|------------------------------|----------------------|
| Total                                 | 30             | 15 (50.0%)                    | 15 (50.0%)                   | -                    |
| Age at diagnosis                      |                |                               |                              |                      |
| <63 years                             | 14             | 10 (71.4%)                    | 4 (28.6%)                    | 0.066                |
| ≥63 years                             | 16             | 5 (31.3%)                     | 11 (68.7%)                   |                      |
| Tumor size <sup>d</sup>               |                |                               |                              |                      |
| pT1                                   | 14             | 8 (57.2%)                     | 6 (42.8%)                    | 0.715                |
| pT2-3                                 | 16             | 7 (43.7%)                     | 9 (56.3%)                    |                      |
| Lymph node status <sup>d</sup>        |                |                               |                              |                      |
| pN0                                   | 17             | 7 (41.2%)                     | 10 (58.2%)                   | 0.462                |
| pN1-3                                 | 12             | 7 (58.3%)                     | 5 (41.7%)                    |                      |
| Histological tumor grade <sup>e</sup> |                |                               |                              |                      |
| G1-2                                  | 8              | 7 (87.5%)                     | 1 (12.5%)                    | <b>0.035</b>         |
| G3                                    | 22             | 8 (36.4%)                     | 14 (63.6%)                   |                      |
| Oestrogen receptor status             |                |                               |                              |                      |
| negative (IRS <sup>f</sup> 0-2)       | 16             | 4 (25.0%)                     | 12 (75.0%)                   | <b>0.009</b>         |
| positive (IRS <sup>f</sup> 3-12)      | 14             | 11 (78.6%)                    | 3 (21.4%)                    |                      |
| Progesterone receptor status          |                |                               |                              |                      |
| negative (IRS <sup>f</sup> 0-2)       | 15             | 5 (33.3%)                     | 10 (66.7%)                   | 0.066                |
| positive (IRS <sup>f</sup> 3-12)      | 15             | 10 (66.7%)                    | 5 (33.3%)                    |                      |
| HER2 status <sup>g</sup>              |                |                               |                              |                      |
| negative                              | 24             | 11 (45.8%)                    | 13 (54.2%)                   | 0.651                |
| positive                              | 6              | 4 (66.7%)                     | 2 (33.3%)                    |                      |

<sup>a</sup>Only female patients with primary, unilateral, invasive breast cancer were included. <sup>b</sup>Expression was dichotomized into “*DKK3* high” and “*DKK3* low” based on the median *DKK3* expression. <sup>c</sup>Fisher’s exact test. Significant P-values are marked in bold face. <sup>d</sup>According to TNM classification by Sobin and Wittekind [1]. <sup>e</sup>According to Bloom and Richardson, as modified by Elston and Ellis [2]. <sup>f</sup>Immunoreactive score (IRS) according to Remmele and Stegner [3]. <sup>g</sup>Overexpression of the *ERBB2* gene (Her-2/neu) was diagnosed analogously to the threshold of the DAKO-Score system based on IHC assay. Uncertain cases were additionally validated by FISH assay. Percentages may not sum-up to 100% due to rounding.

1. Sobin LH, Fleming ID. TNM Classification of Malignant Tumors, fifth edition (1997). Union Internationale Contre le Cancer and the American Joint Committee on Cancer. Cancer. 1997;80(9):1803-4. PubMed PMID: 9351551;
2. Elston CW, Ellis IO. Pathological prognostic factors in breast cancer. I. The value of histological grade in breast cancer: experience from a large study with long-term follow-up. Histopathology. 1991;19(5):403-10. PubMed PMID: 1757079;
3. Remmele W, Stegner HE. Recommendation for uniform definition of an immunoreactive score (IRS) for immunohistochemical estrogen receptor detection (ER-ICA) in breast cancer tissue. Pathologie. 1987;8(3):138-40. PubMed PMID: 3303008;
