# Supplementary material for: Loss of Dickkopf 3 Promotes the Tumorigenesis of Basal Breast Cancer
Source: PubMed Central journal article supplement (PMC4965070; doi:10.1371/journal.pone.0160077), 2016-07-28
Supplement: pone.0160077.s007.pdf [file pone.0160077.s007.pdf]

**Supplementary Table 7: Clinico-pathological parameters of breast cancer specimens obtained from *The Cancer Genome Atlas* platform in relation to *DKK3* mRNA expression**

| Parameter                        | n <sup>a</sup> | <i>DKK3</i> high <sup>b</sup> | <i>DKK3</i> low <sup>b</sup> | P-value <sup>c</sup> |
|----------------------------------|----------------|-------------------------------|------------------------------|----------------------|
| Total                            | 791            | 401 (50.7%)                   | 390 (49.3%)                  | -                    |
| Age at diagnosis                 |                |                               |                              |                      |
| ≤58 years                        | 409            | 213 (52.1%)                   | 196 (47.9%)                  | 0.434                |
| >58 years                        | 382            | 188 (49.2%)                   | 194 (50.8%)                  |                      |
| Tumor size <sup>d</sup>          |                |                               |                              |                      |
| pT1                              | 209            | 123 (58.9%)                   | 86 (41.2%)                   | <b>0.006</b>         |
| pT2-4                            | 582            | 278 (47.8%)                   | 304 (52.2%)                  |                      |
| Lymph node status <sup>d</sup>   |                |                               |                              |                      |
| pN0                              | 375            | 178 (47.5%)                   | 197 (52.5%)                  | 0.073                |
| pN1-3                            | 403            | 218 (54.1%)                   | 185 (45.9%)                  |                      |
| Estrogen receptor status         |                |                               |                              |                      |
| negative (IRS <sup>e</sup> 0-2)  | 176            | 61 (34.7%)                    | 115 (65.3%)                  | <b>&gt;0.001</b>     |
| positive (IRS <sup>e</sup> 3-12) | 577            | 321 (55.6%)                   | 256 (44.4%)                  |                      |
| Progesterone receptor status     |                |                               |                              |                      |
| negative (IRS <sup>e</sup> 0-2)  | 246            | 96 (39.0%)                    | 150 (61.0%)                  | <b>&gt;0.001</b>     |
| positive (IRS <sup>e</sup> 3-12) | 504            | 285 (56.6%)                   | 219 (43.5%)                  |                      |
| HER2 status <sup>f</sup>         |                |                               |                              |                      |
| negative                         | 600            | 296 (49.3%)                   | 304 (50.7%)                  | <b>0.041</b>         |
| positive                         | 102            | 62 (60.8%)                    | 40 (39.2%)                   |                      |

<sup>a</sup>Only female patients with primary, invasive breast cancer were included. <sup>b</sup>Expression was dichotomized into “*DKK3* high” and “*DKK3* low” based on the median *DKK3* expression. <sup>c</sup>Fisher’s exact test. Significant P-values are marked in bold face. <sup>d</sup>According to TNM classification by Sobin and Wittekind [1]. <sup>e</sup>Immunoreactive score (IRS) according to Remmele and Stegner [2]. <sup>f</sup>Overexpression of the *ERBB2* gene (Her-2/neu) was diagnosed analogously to the threshold of the DAKO-Score system based on IHC assay. Percentages may not sum-up to 100% due to rounding.

1. Sobin LH, Fleming ID. TNM Classification of Malignant Tumors, fifth edition (1997). Union Internationale Contre le Cancer and the American Joint Committee on Cancer. Cancer. 1997;80(9):1803-4. PubMed PMID: 9351551;
2. Remmele W, Stegner HE. Recommendation for uniform definition of an immunoreactive score (IRS) for immunohistochemical estrogen receptor detection (ER-ICA) in breast cancer tissue. Pathologie. 1987;8(3):138-40. PubMed PMID: 3303008;
